# Supplementary material for: Multifunctional MnO2nanosheet-modified Fe3O4@SiO2/NaYF4:Yb, Er nanocomposites as novel drug carriers
Source: Royal Society of Chemistry journal article supplement (doi:10.1039/c3dt52066h), 2013-09-07
Supplement: c3dt52066h.pdf [file c3dt52066h.pdf]

**Electronic Supplementary Information For**

**Multifunctional MnO<sub>2</sub>-Nanosheet-Modified Fe<sub>3</sub>O<sub>4</sub>@SiO<sub>2</sub>/NaYF<sub>4</sub>: Yb,  
Er Nanocomposites as Novel Drug Carriers**

Peng Zhao, Yihua Zhu,\* Xiaoling Yang, Jianhua Shen, Xin Jiang, Jie Zong and  
Chunzhong Li

Key Laboratory for Ultrafine Materials of Ministry of Education, School of Materials  
Science and Engineering, East China University of Science and Technology, 130  
Meilong Road, Shanghai 200237, China

\*Corresponding author: Tel.: +86-21-64252022, Fax: +86-21-64250624

E-mail address: yhzhu@ecust.edu.cn (Y. Zhu)

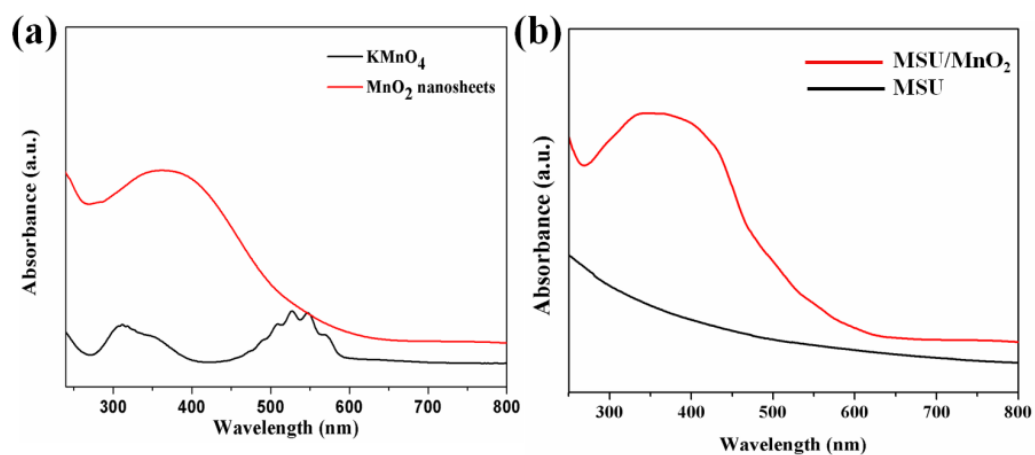

Figure S1 UV-vis absorption spectra of aqueous solutions of (a)  $\text{KMnO}_4$  and  $\text{MnO}_2$  nanosheets, (b) MSU composites and MSU/ $\text{MnO}_2$  nanocomposites.

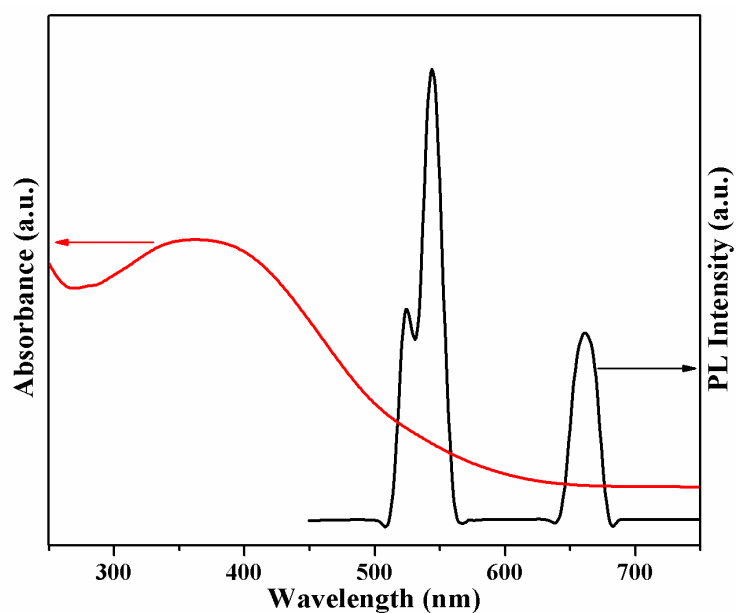

Figure S2 Absorption spectrum (red line) of  $\text{MnO}_2$  nanosheets showing the spectral overlapping with the emission spectrum (black line) of the MSU nanocomposites excited at 980 nm.

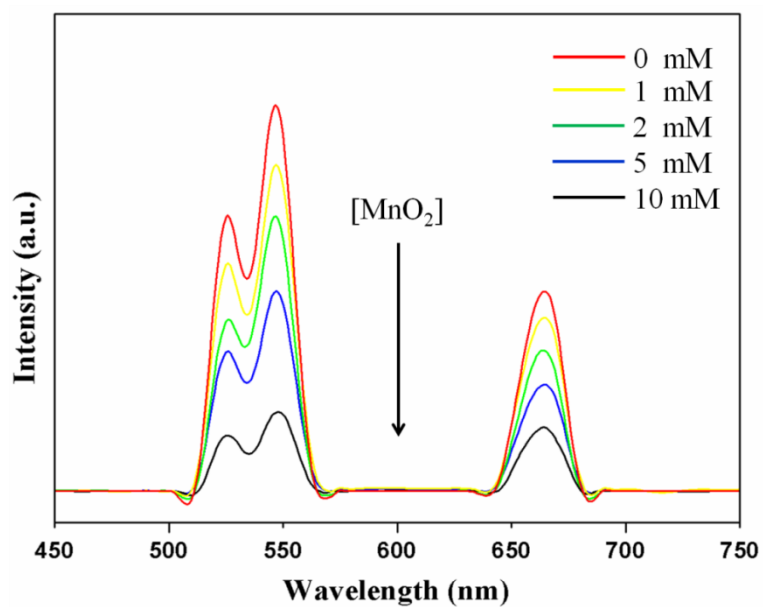

Figure S3 Upconversion emission spectra of MSU modified with MnO<sub>2</sub> nanosheets at different concentrations. The concentrations of MSU fixed at 1mM.
